# Supplementary material for: Interphase Engineering of a Cellulose‐Based Carbon Fiber Reinforced Composite by Applying Click Chemistry
Source: PubMed Central journal article supplement — ChemistryOpen. 2018 Sep 24;7(9):720–9. doi: 10.1002/open.201800180 (PMC6151626; doi:10.1002/open.201800180), 2018-09-24
Supplement: OPEN-7-720-s001.pdf [file OPEN-7-720-s001.pdf]

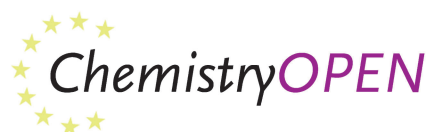

## Supporting Information

© 2018 The Authors. Published by Wiley-VCH Verlag GmbH & Co. KGaA, Weinheim

### **Interphase Engineering of a Cellulose-Based Carbon Fiber Reinforced Composite by Applying Click Chemistry**

László Szabó,<sup>\*[a]</sup> Sari Imanishi,<sup>[a]</sup> Naohiro Kawashima,<sup>[a]</sup> Rina Hoshino,<sup>[a]</sup> Daisuke Hirose,<sup>[a]</sup> Takayuki Tsukegi,<sup>[b]</sup> Kazuaki Ninomiya,<sup>[c]</sup> and Kenji Takahashi<sup>\*[a]</sup>

open\_201800180\_sm\_miscellaneous\_information.pdf

**Table of Contents**

|                                                   |    |
|---------------------------------------------------|----|
| 1. Synthetic procedures .....                     | 2  |
| 2. Characterization of cellulose derivatives..... | 6  |
| 3. XPS spectra .....                              | 10 |
| 4. Chemical mapping of carbon fiber samples ..... | 12 |
| 5. Cyclic voltammetry experiments.....            | 21 |
| 6. References .....                               | 22 |

## 1. Synthetic procedures

### 1.1. One-pot synthesis of *O*-acylated 6-chloro-6-deoxycellulose

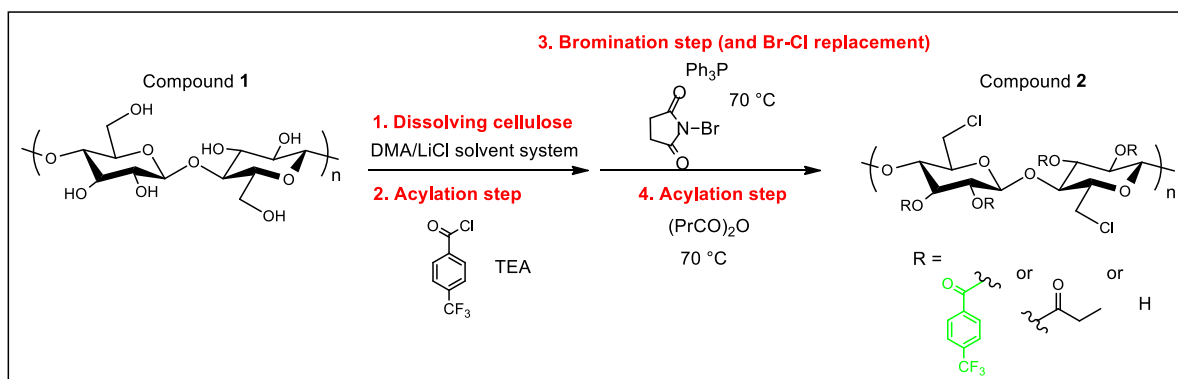

- 1) Dissolution of microcrystalline cellulose (Avicel<sup>®</sup> PH 101, Compound 1) was performed in DMA/LiCl solvent system according to Heinze et al.<sup>[1]</sup> Briefly, 3 g cellulose (18.5 mmol anhydroglucose units) was stirred in 120 mL DMA at 130 °C for 2 h. Thereafter, the system was cooled to 100 °C at which point, 9 g anhydrous LiCl was added. The cellulose completely dissolved as the system cooled down to room temperature.
- 2) 0.5 mL triethylamine (3.7 mmol) was added to the system, followed by dropwise addition of 0.55 mL 4-(trifluoromethyl)benzoyl chloride (3.7 mmol), and the reaction mixture was stirred overnight at room temperature.
- 3) 19.43 g triphenylphosphine (74 mmol) was dissolved in 30 mL DMA and another solution was prepared with 13.18 g *N*-bromosuccinimide (74 mmol) inside. The triphenylphosphine solution was measured to the solution containing the cellulose derivative dropwise, following dropwise addition of the *N*-bromosuccinimide solution. The system was kept at 70 °C under Ar atmosphere for 2 h.
- 4) 23.7 mL propionic anhydride was added to the reaction mixture (185 mmol) and it was stirred overnight at 70 °C. The product was precipitated in 50/50% water-methanol mixture and re-precipitated using acetone as a solvent. The resulting product was dried in a vacuum oven at 50 °C for 24 h.

The resulting product was identified as XPS-tagged propionated 6-chloro-6-deoxycellulose (Compound 2) according to the <sup>1</sup>H-, <sup>13</sup>C-NMR (Figure S1 and S2, respectively) and FTIR spectra (Figure S3). The DS value was determined to be 2.16 for the propionate units and 0.03

for the XPS-tag from the integrals in Figure S1. After benzylation reaction, the  $^1\text{H-NMR}$  spectrum indicated that all the hydroxyl groups were substituted, and therefore, the DS value was 0.81 in respect to the chlorine substituent.

### 1.2. Synthesis of *O*-acylated 6-azido-6-deoxycellulose

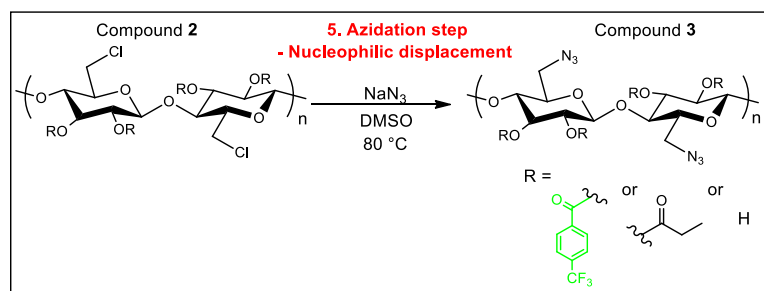

3 g XPS-tagged propionated 6-chloro-6-deoxycellulose (18.52 mmol anhydroglucose units, Compound **2**) was dissolved in 100 mL anhydrous DMSO. 6.02 g  $\text{NaN}_3$  (92.6 mmol) was measured into the flask and dissolved under vigorous stirring. The reaction system was kept at 80 °C for 24 h under Ar atmosphere. The product was precipitated in deionized water and the collected filtrate was reprecipitated after drying using acetone as a solvent. The resulting product was dried in a vacuum oven at 50 °C for 24 h.

The resulting product was identified as XPS-tagged propionated 6-azido-6-deoxycellulose (Compound **3**) according to the  $^1\text{H-}$ ,  $^{13}\text{C-NMR}$  (Figure S4 and S5) and FTIR spectra (Figure S3). The DS value in respect to the  $-\text{N}_3$  substituent was determined to be 0.77 from elemental analysis.

### 1.3. Functionalization of the carbon fiber surface with phenylacetylene moiety

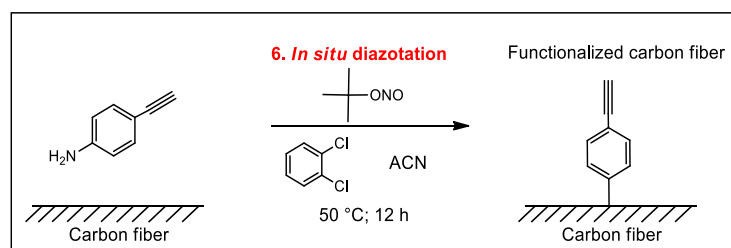

The diazotization and *in situ* grafting process was derived from Bahr and Tour.<sup>[2]</sup> The same procedure was applied in recent studies on carbon fibers.<sup>[3,4]</sup> 30 mL *ortho*-dichlorobenzene, 15 mL acetonitrile and 85.5 mg 4-ethynylaniline (0.73 mmol) was bubbled with nitrogen for 10 min (degassing process). 25 mg carbon fiber was then immersed in the solution under

nitrogen atmosphere. To this solution, 170  $\mu\text{L}$  isoamyl nitrite (1.5 mmol) was added and the reaction flask was heated to 50  $^{\circ}\text{C}$ . After 24 h reaction time the solvents were decanted and the fibers were washed with dichloromethane until yielding a clear solution. Thereafter, the fibers were rinsed with 200 mL dichloromethane, water and acetone using a Buchner funnel, and then placed in a vacuum oven for 24 h at 50  $^{\circ}\text{C}$ .

#### 1.4. Click reaction of *O*-acylated 6-azido-6-deoxycellulose on the carbon fiber surface

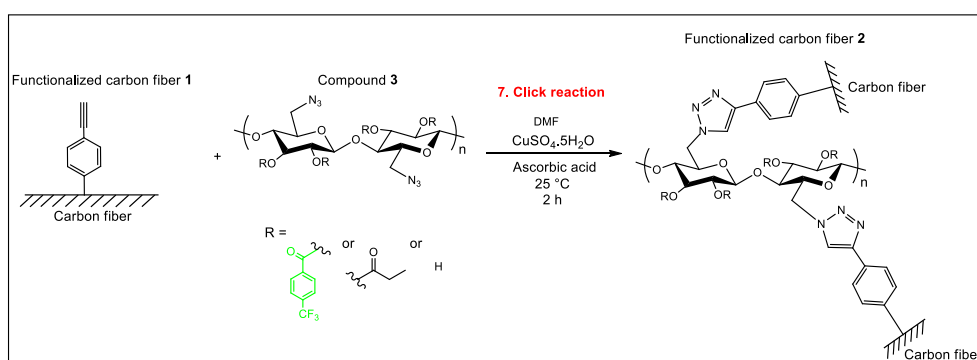

25 mg carbon fiber (Functionalized carbon fiber 1) was immersed in 50 mL DMF containing 1 g cellulose derivative (Compound 3). To this solution, 0.2497 g  $\text{CuSO}_4 \cdot 5\text{H}_2\text{O}$  (1 mmol) and 0.344 g ascorbic acid (2 mmol) dissolved in 20 mL DMF was added. The reaction was stirred at room temperature for 2 h. After that, the fibers were washed with 200 mL 1 M aqueous EDTA, dichloromethane, water and acetone. The functionalized carbon fibers were placed in the vacuum oven for 24 h at 50  $^{\circ}\text{C}$ .

#### 1.5. Click reaction for grafting small molecules on the carbon fiber surface

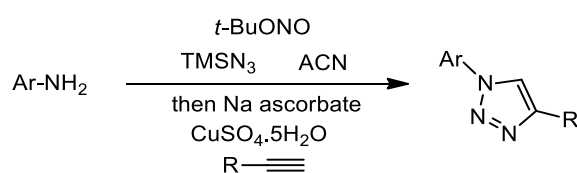

The one-pot click reaction on solid phase was performed according to the highly efficient procedure elaborated by Barral et al.<sup>[5]</sup> 66.5  $\mu\text{L}$  aniline (0.73 mmol) was dissolved in 20 mL acetonitrile and cooled to 0  $^{\circ}\text{C}$  using an ice bath. 130  $\mu\text{L}$  isoamyl nitrite (*t*-BuONO; 1.095 mmol) was measured into the flask followed by dropwise addition of 116  $\mu\text{L}$   $\text{TMSN}_3$  (0.87 mmol). The reaction medium was allowed to warm to room temperature within 2 h. After that, 25 mg phenylacetylene-functionalized carbon fiber was added to the system along with 25.7 mg sodium ascorbate (0.145 mmol) and 8.99 mg  $\text{CuSO}_4 \cdot 5\text{H}_2\text{O}$  (0.036 mmol) dissolved in 2

mL water. The reaction mixture was stirred overnight at room temperature. The fibers were washed with 200 mL 1 M aqueous EDTA, dichloromethane, water and acetone. The functionalized carbon fibers were placed in the vacuum oven for 24 h at 50 °C.

#### 1.6. Deprotection step of 4-[(*N*-Boc)aminomethyl]aniline-functionalized carbon fiber

The deprotection step was carried out according to Servinis et al.<sup>[3]</sup> Briefly, functionalized fibers were added to 20 mL 2 M anhydrous HCl - 1,4-dioxane solution, and left to react for 24 h at room temperature. After that, the fibers were washed with 3 × 150 mL water and then treated with 2 M 20 mL NaOH solution for 10 min, three times. Thereafter, the fibers were washed with 100 mL water five times and with 150 mL acetone using a Buchner funnel. The functionalized samples were dried in a vacuum oven at 50 °C for 24 h.

#### 1.7. Electrochemical grafting – synthesis of the diazonium salt

Synthesis of the diazonium salt for electrochemical grafting experiment was performed according to Kosynkin et al.<sup>[6]</sup> 0.2336 g NOBF<sub>4</sub> (2 mmol) was measured in a flask under argon atmosphere and dry acetonitrile (10 mL) was injected through a rubber septum. The flask was then cooled down in an acetonitrile/liquid nitrogen bath (-41 °C). Thereafter, 0.2343 g 4-ethynylaniline (2 mmol) dissolved in 10 mL acetonitrile was added over 30 min using a syringe. The solution was stirred for 2 hours at -30 °C and then directly used for the electrochemical experiments due to the instability of the diazonium species.

#### 1.8. Electrochemical grafting – cyclic voltammetry experiments

Cyclic voltammetry experiments were carried out with a 3-electrode system using an ALS/CHI Instruments Electrochemical Analyzer Model 1200A potentiostat and a SVC3 voltammetry cell (ALS Co., Ltd, Tokyo, Japan). Ag/Ag<sup>+</sup> non-aqueous reference electrode (RE-7, ALS Co., Ltd, Tokyo, Japan) and a platinum counter electrode were applied (ALS Co., Ltd, Tokyo, Japan). The working electrode was ~20 cm long carbon fiber (25 mg) fixed to the terminal using a copper tape. The supporting electrolyte was 0.1 M tetrabutylammonium hexafluorophosphate in acetonitrile. The working electrode was cycled between 1 and -1 V vs. Ag/AgNO<sub>3</sub>. 0.2 V s<sup>-1</sup> scan rate and 10 mM diazonium salt concentration was applied. After the electrochemical experiments, the fibers were cleaned thoroughly with 200 mL acetone, dichloromethane and deionized water and dried in a vacuum oven at 50 °C for 24 h.

## 2. Characterization of cellulose derivatives

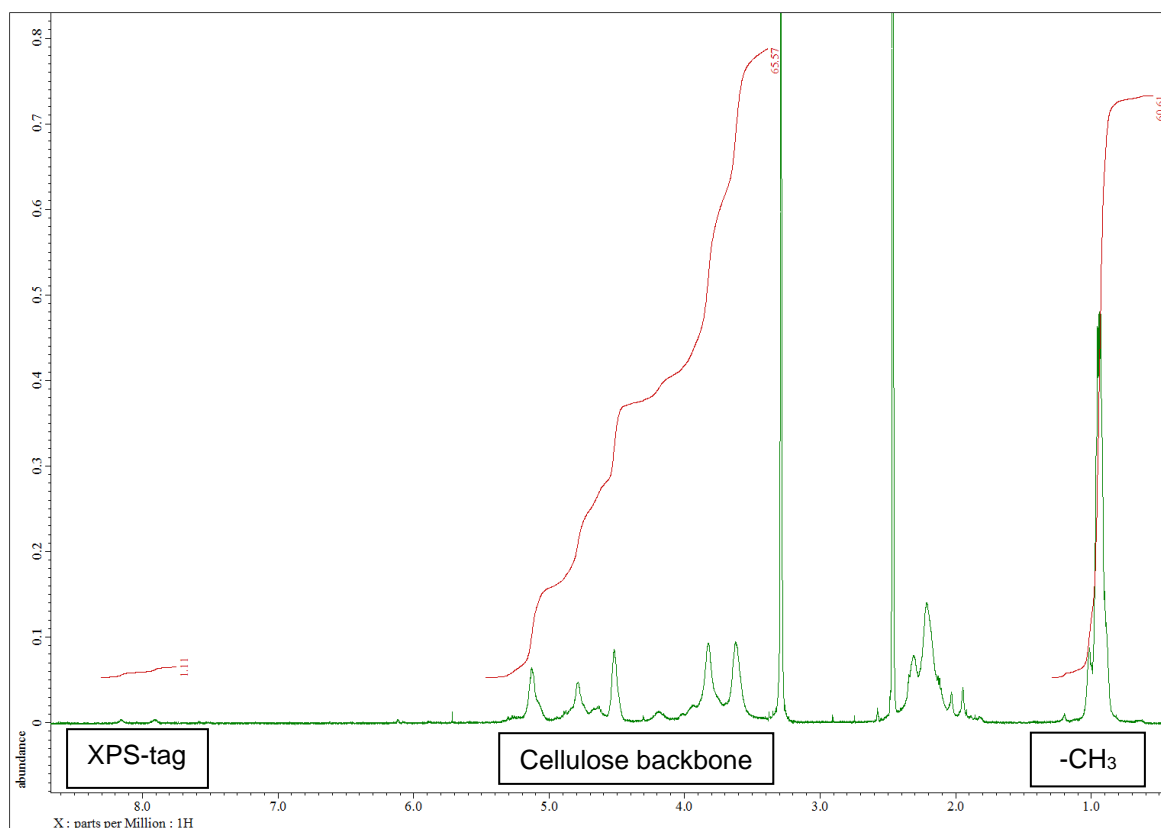

**Figure S1.**  $^1\text{H-NMR}$  spectrum of XPS-tagged propionated 6-chloro-6-deoxycellulose (Compound 2).

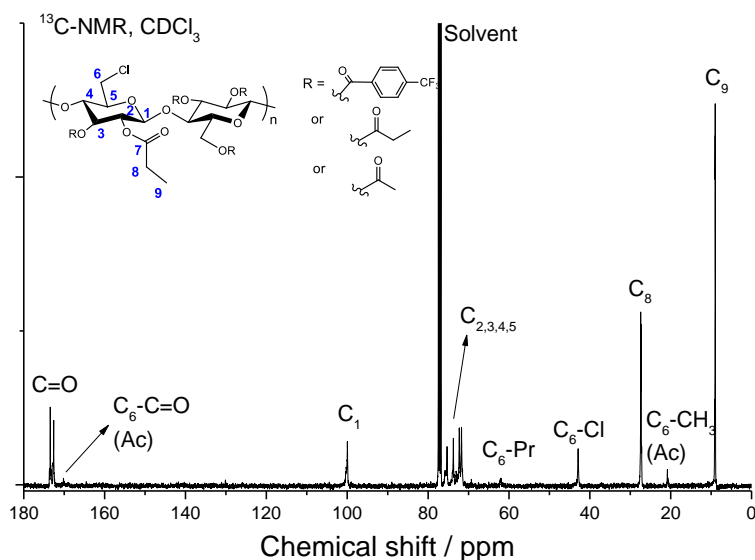

**Figure S2.**  $^{13}\text{C-NMR}$  spectrum of XPS-tagged propionated 6-chloro-6-deoxycellulose (Compound 2). The appearance of acetyl groups is due to a well-known side reaction, when the DMA solvent takes part in the  $\text{S}_{\text{N}}2$  reaction with the alkoxyphosphonium salt intermediate during the bromination process.<sup>[7,8]</sup>

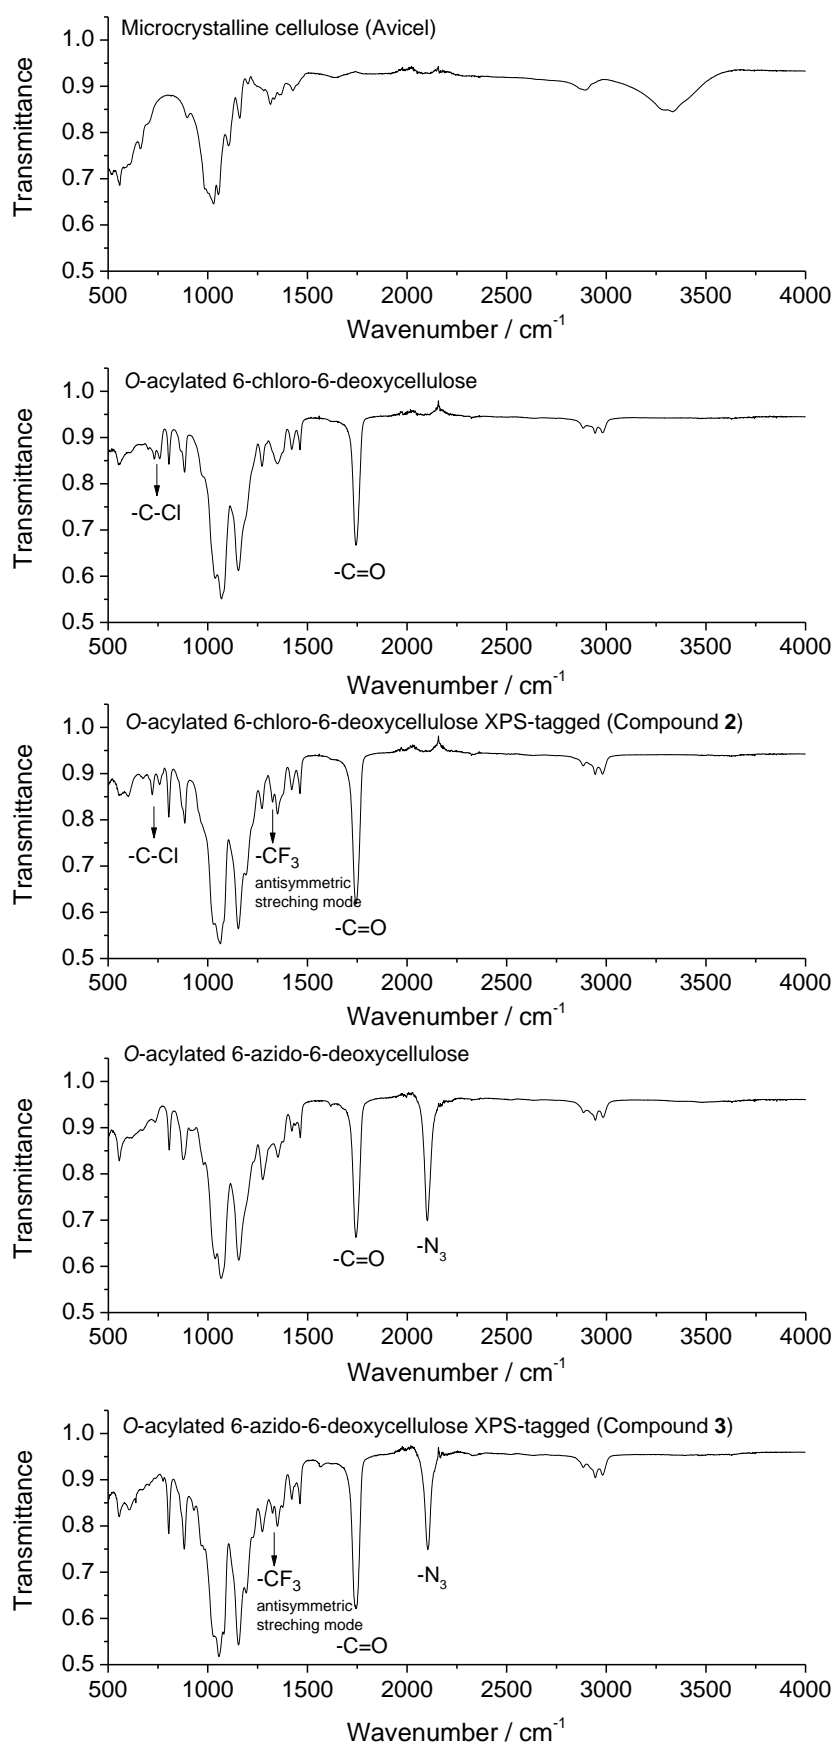

**Figure S3.** FTIR spectra of synthesized cellulose derivatives.



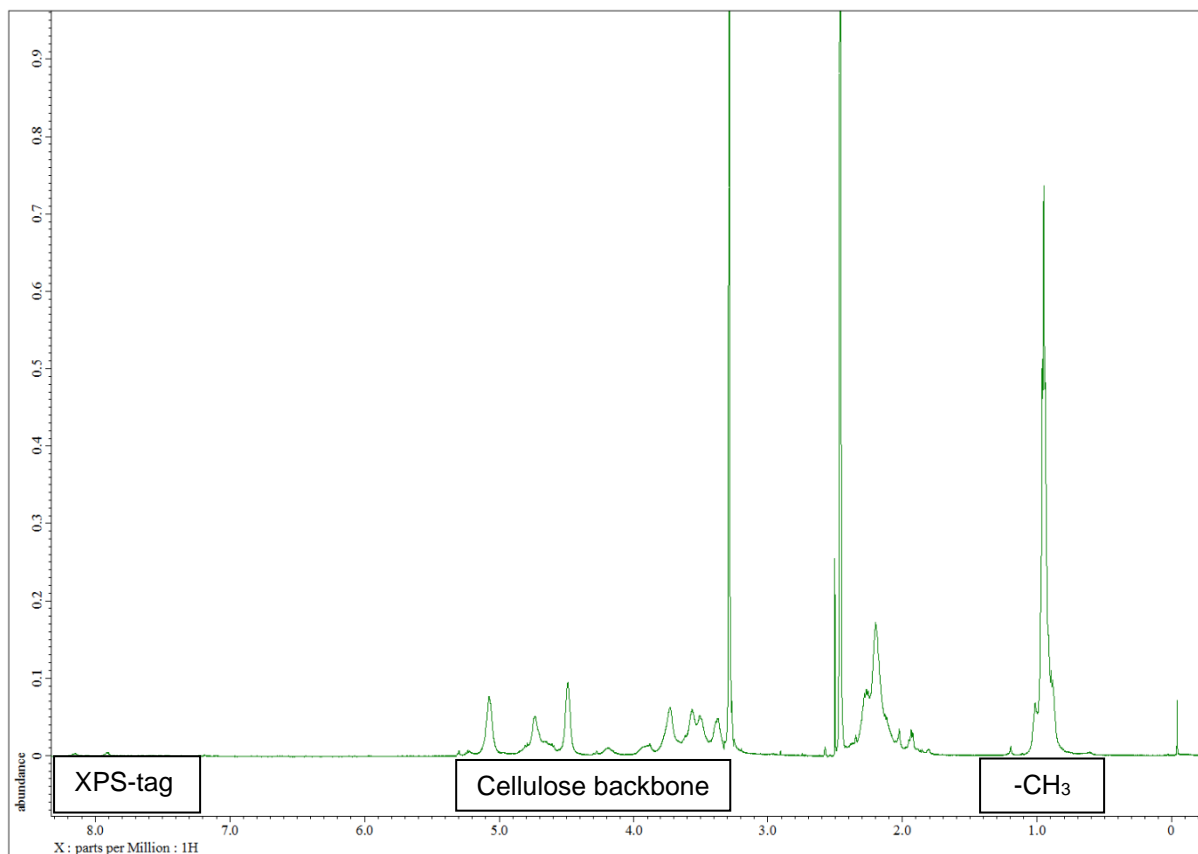

**Figure S4.**  $^1\text{H-NMR}$  spectrum of XPS-tagged propionated 6-azido-6-deoxycellulose (Compound 3).

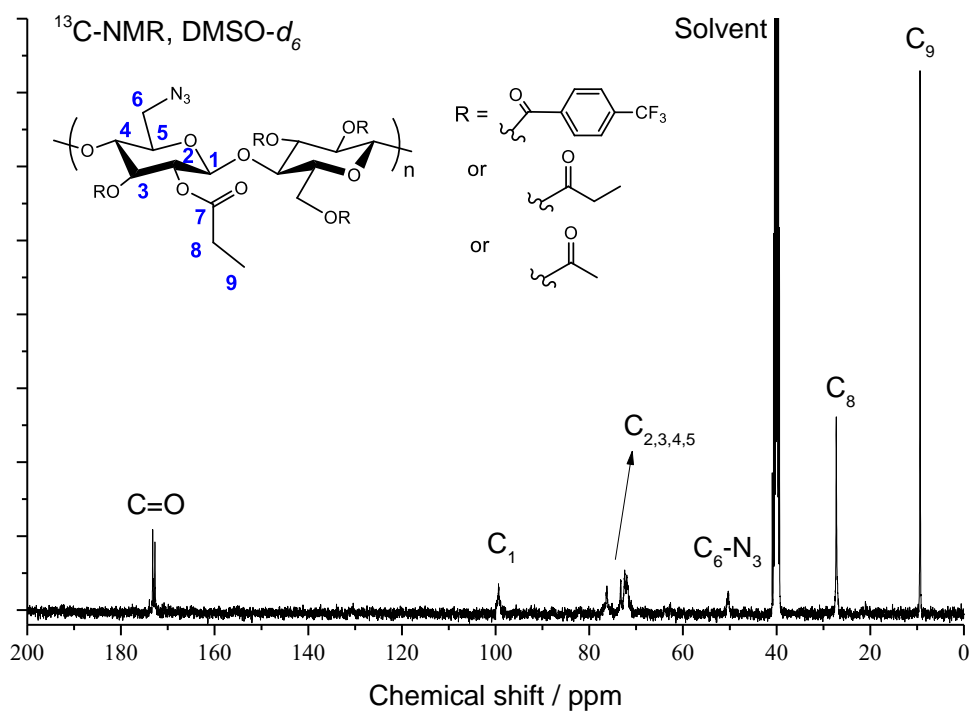

**Figure S5.**  $^{13}\text{C-NMR}$  spectrum of XPS-tagged propionated 6-azido-6-deoxycellulose (Compound 3).

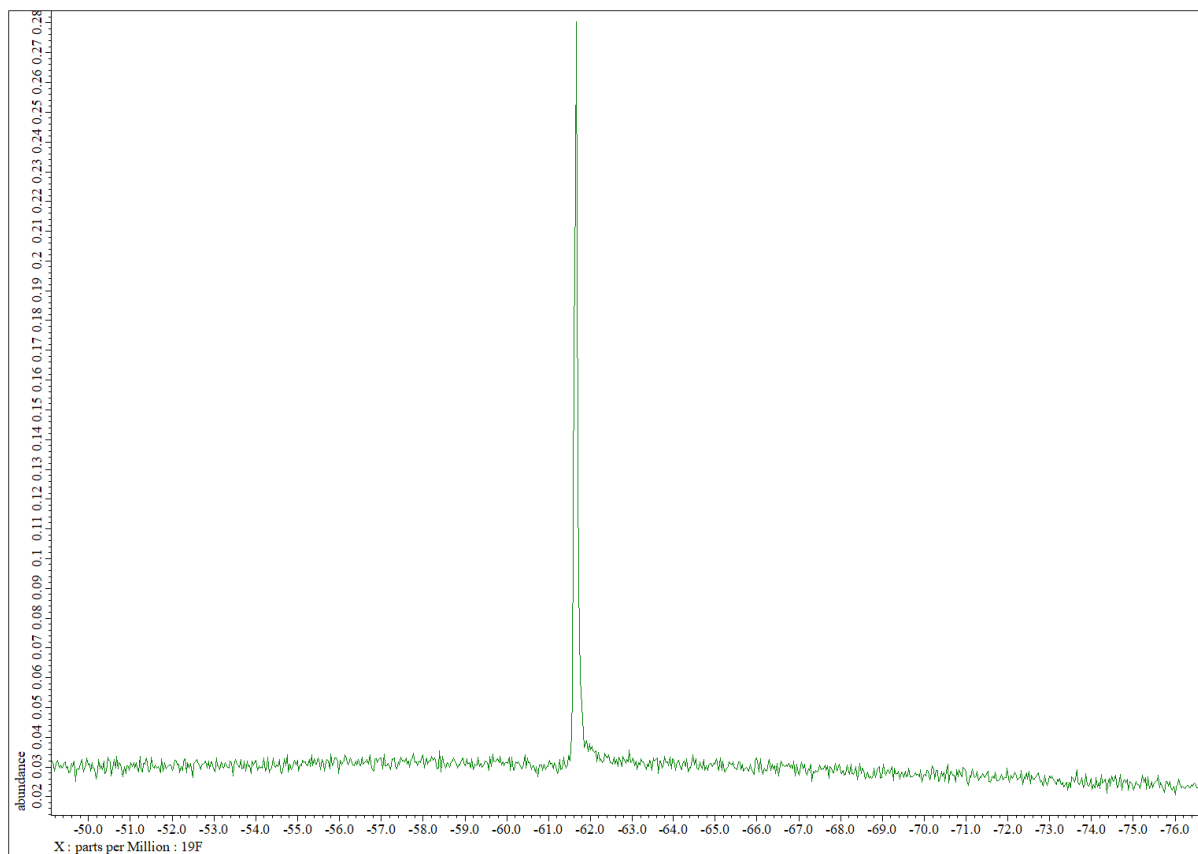

**Figure S6.**  $^{19}\text{F}$ -NMR spectrum of XPS-tagged propionated 6-azido-6-deoxycellulose (Compound 3).

### 3. XPS spectra

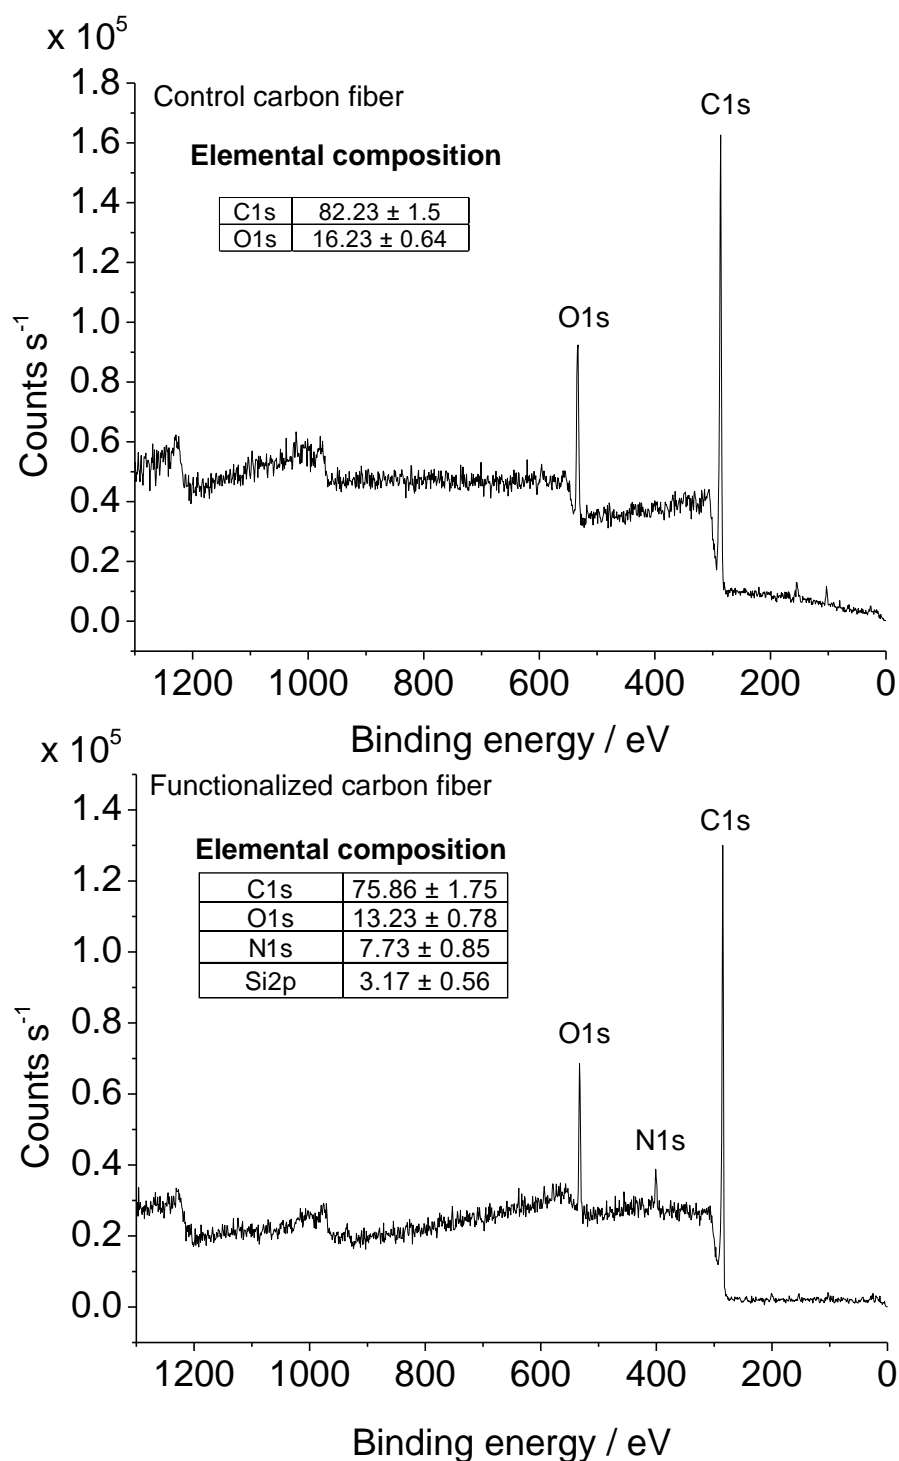

**Figure S7.** Survey spectra of control fiber and samples functionalized with cellulose derivative (Functionalized carbon fiber 2).

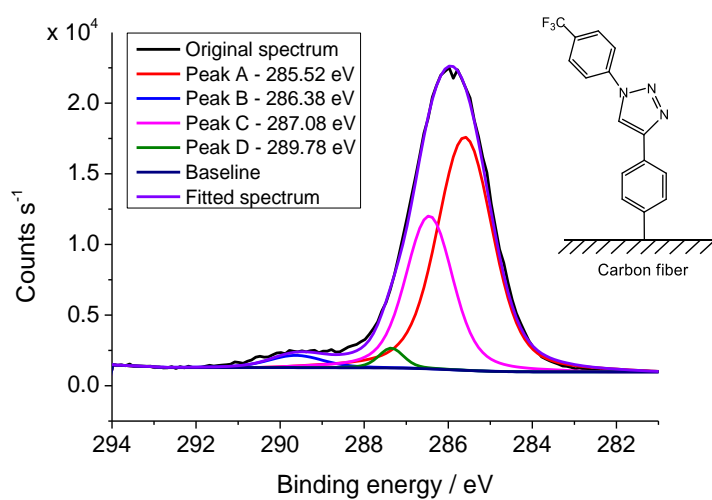

**Figure S8.** High-resolution C1s spectrum of functionalized carbon fiber sample – validation of click reaction with aniline derivatives using the model compound shown on the figure.

#### 4. Chemical mapping of carbon fiber samples

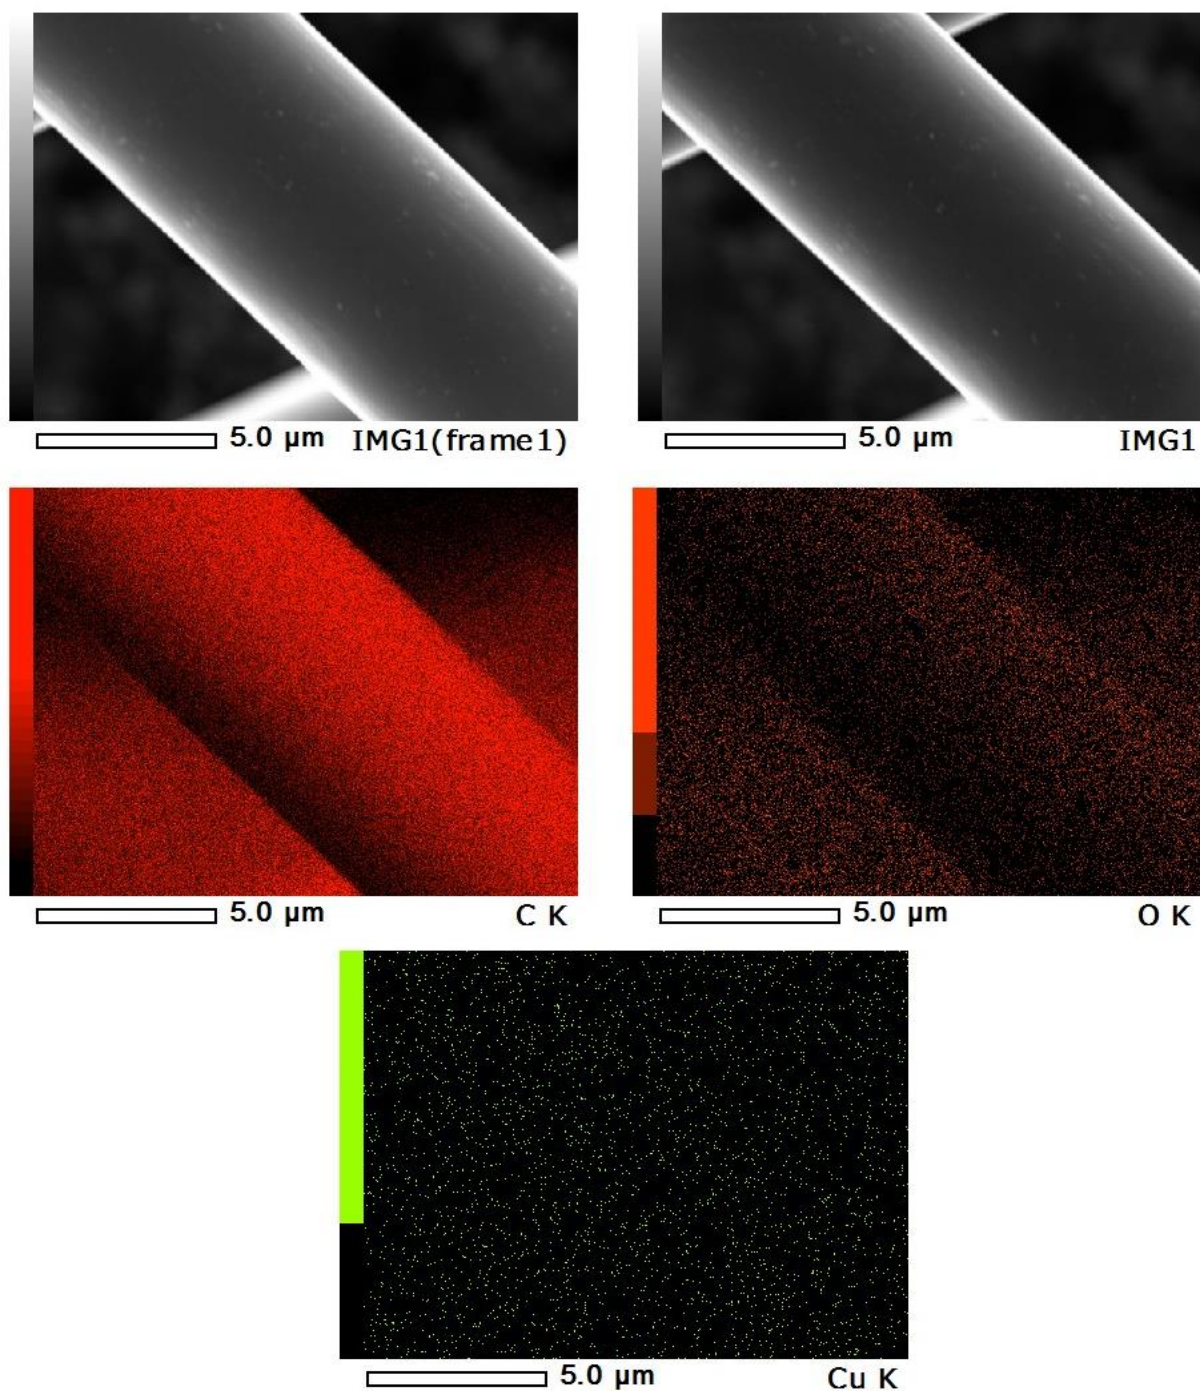

**Figure S9.** Chemical mapping carried out on an unfunctionalized control carbon fiber sample. Please note that Cu signal is from the sample holder.

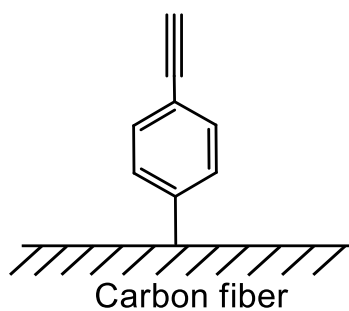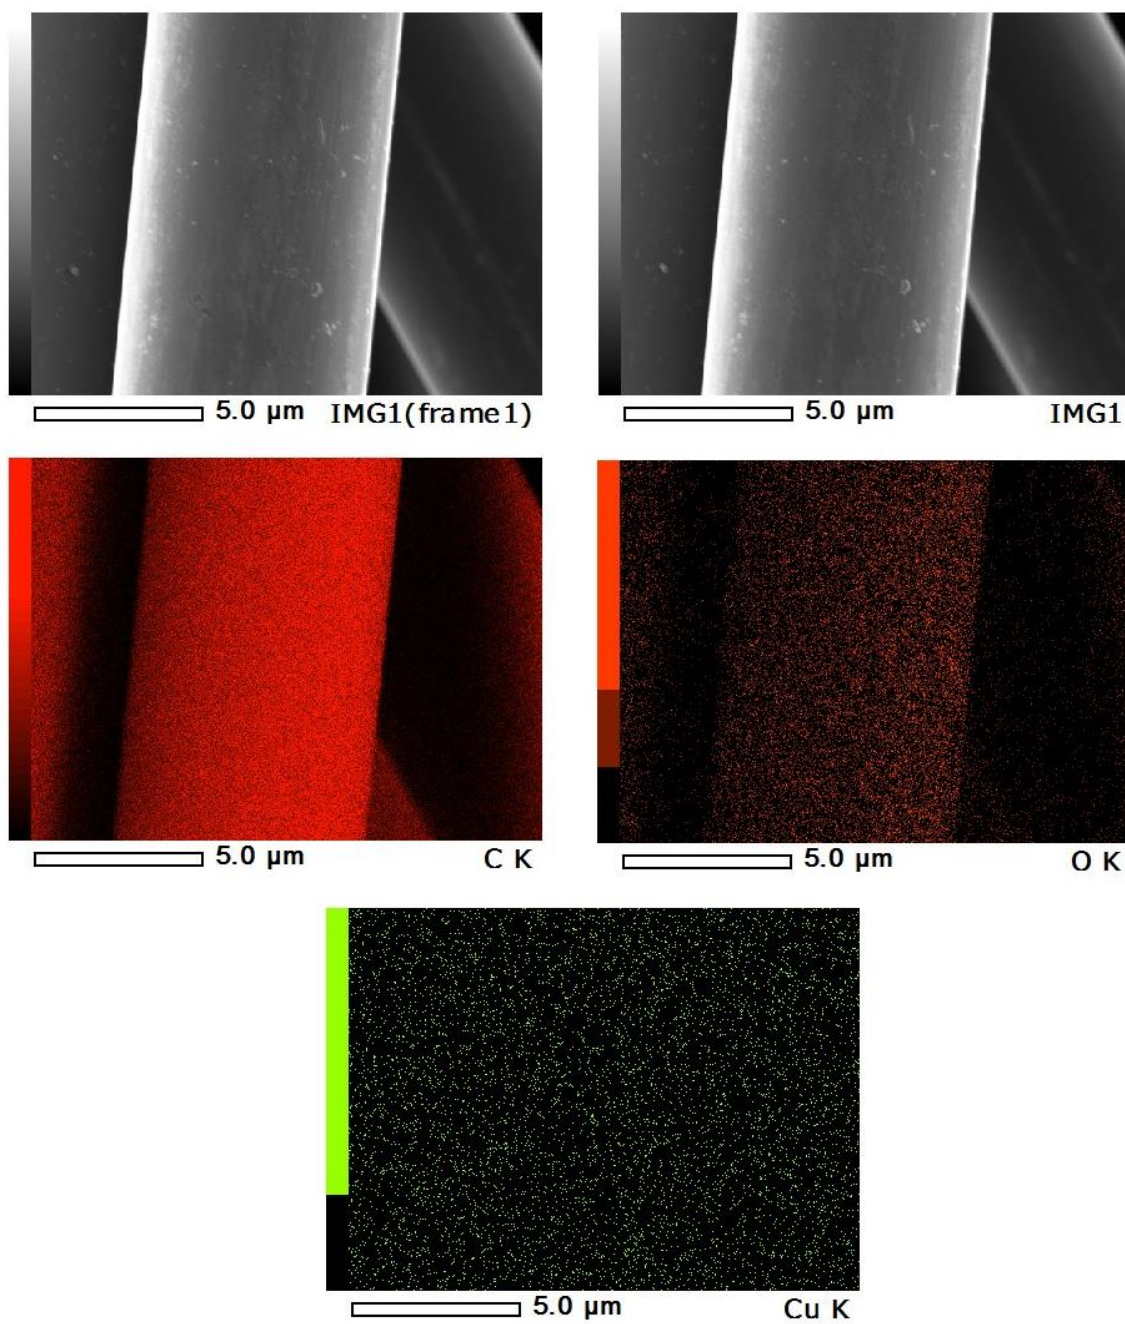

**Figure S10.** Chemical mapping carried out on a functionalized (structure is shown above) carbon fiber sample.

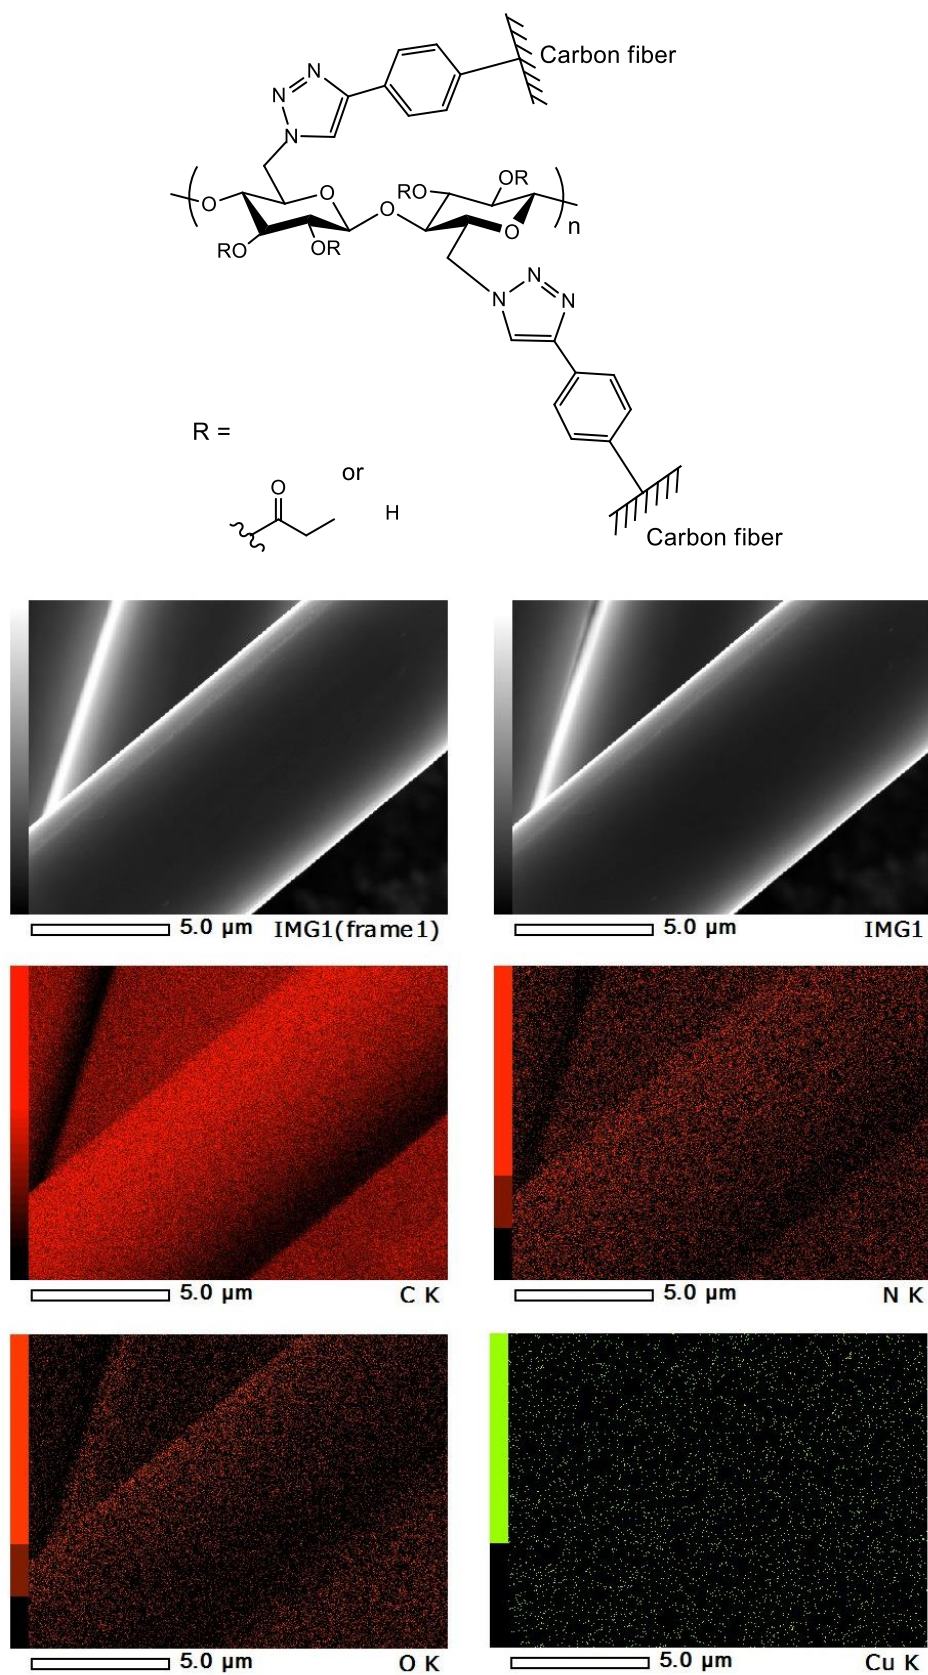

**Figure S11.** Chemical mapping carried out on a functionalized (structure is shown above) carbon fiber sample.

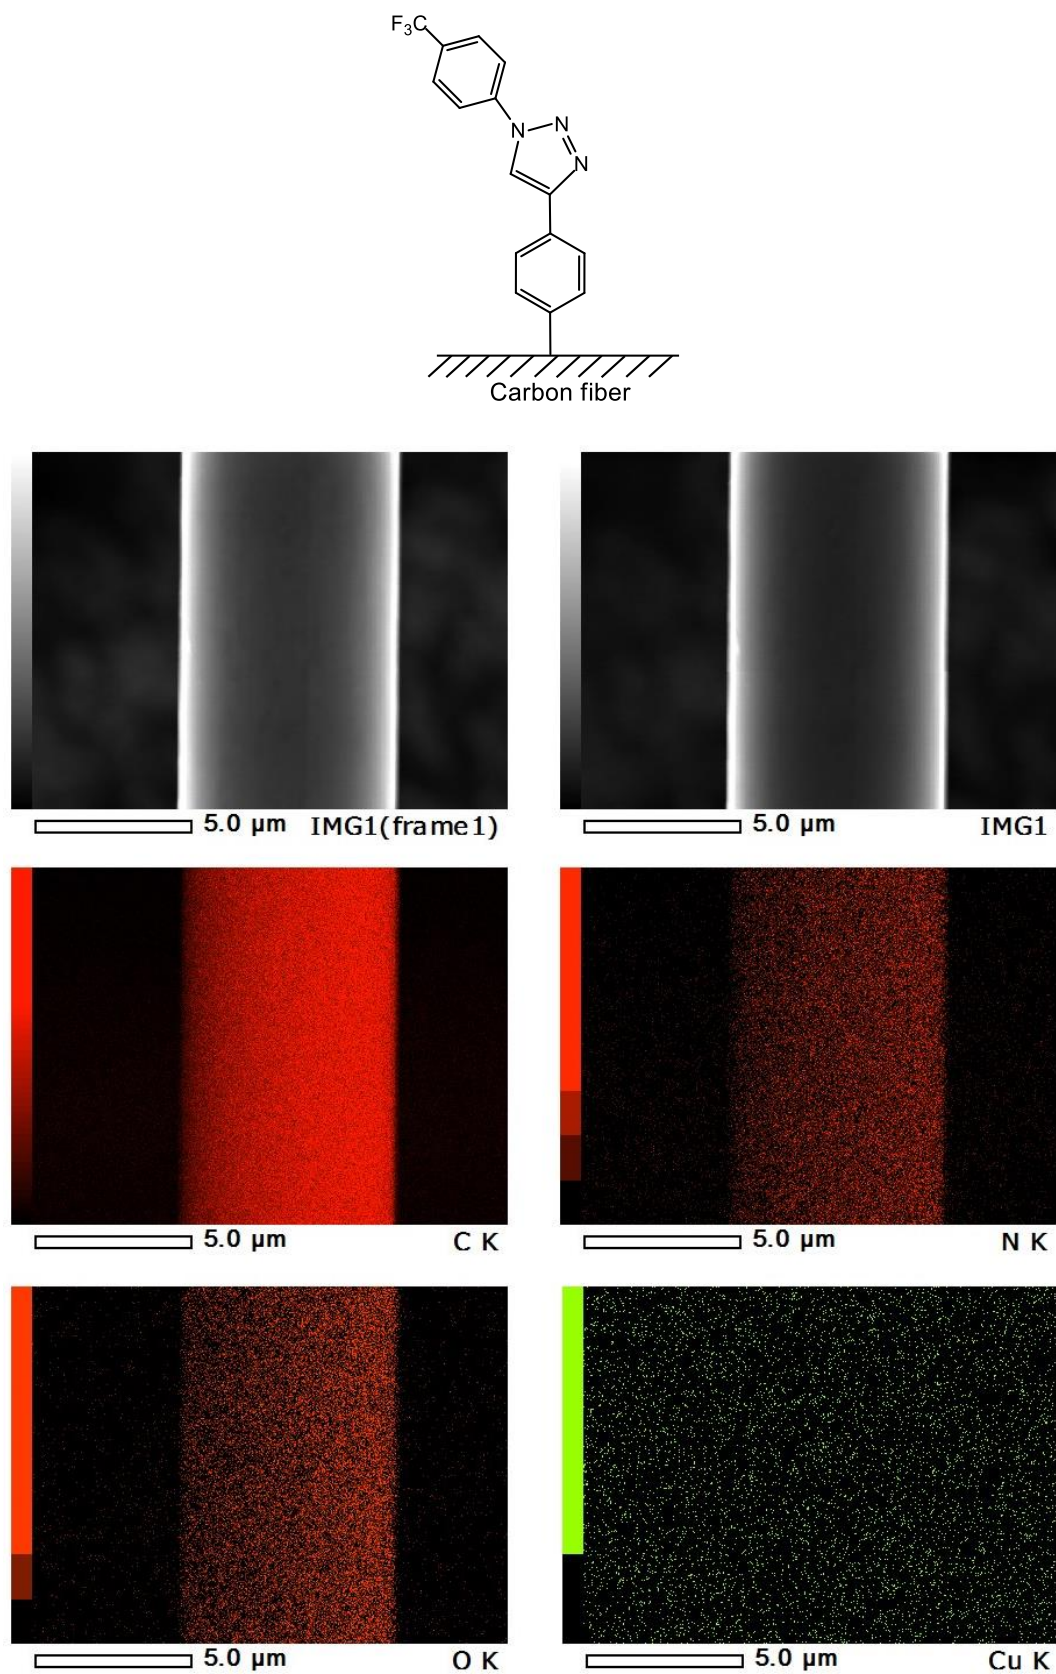

**Figure S12.** Chemical mapping carried out on a functionalized (structure is shown above) carbon fiber sample.



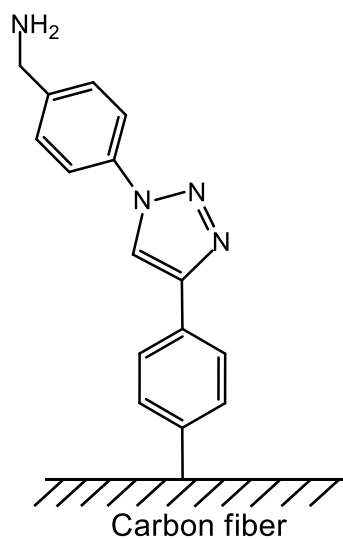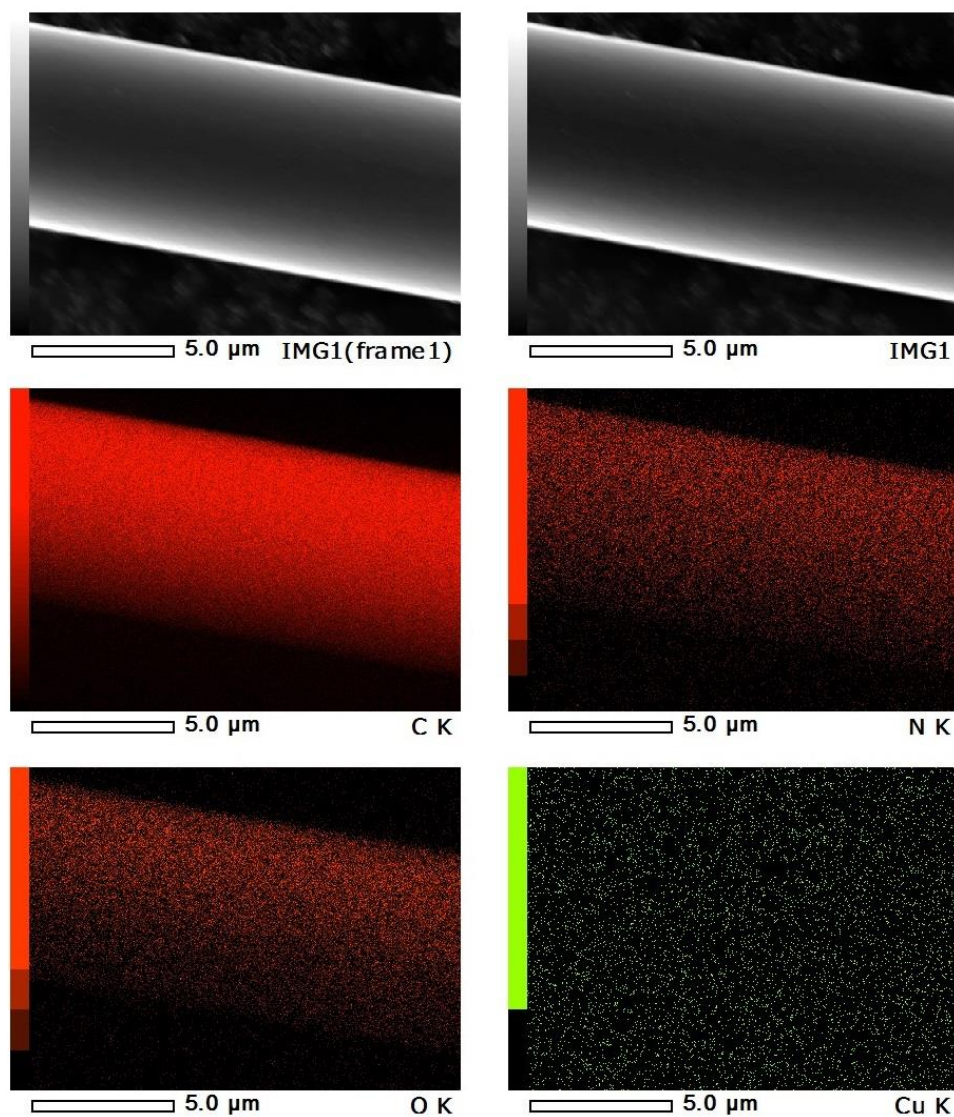

**Figure S13.** Chemical mapping carried out on a functionalized (structure is shown above) carbon fiber sample.

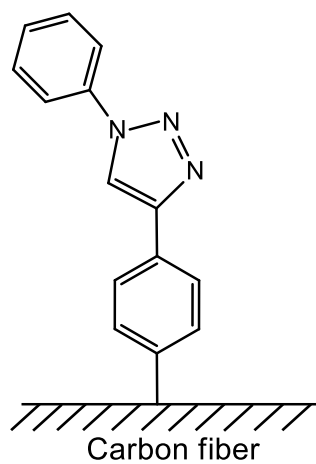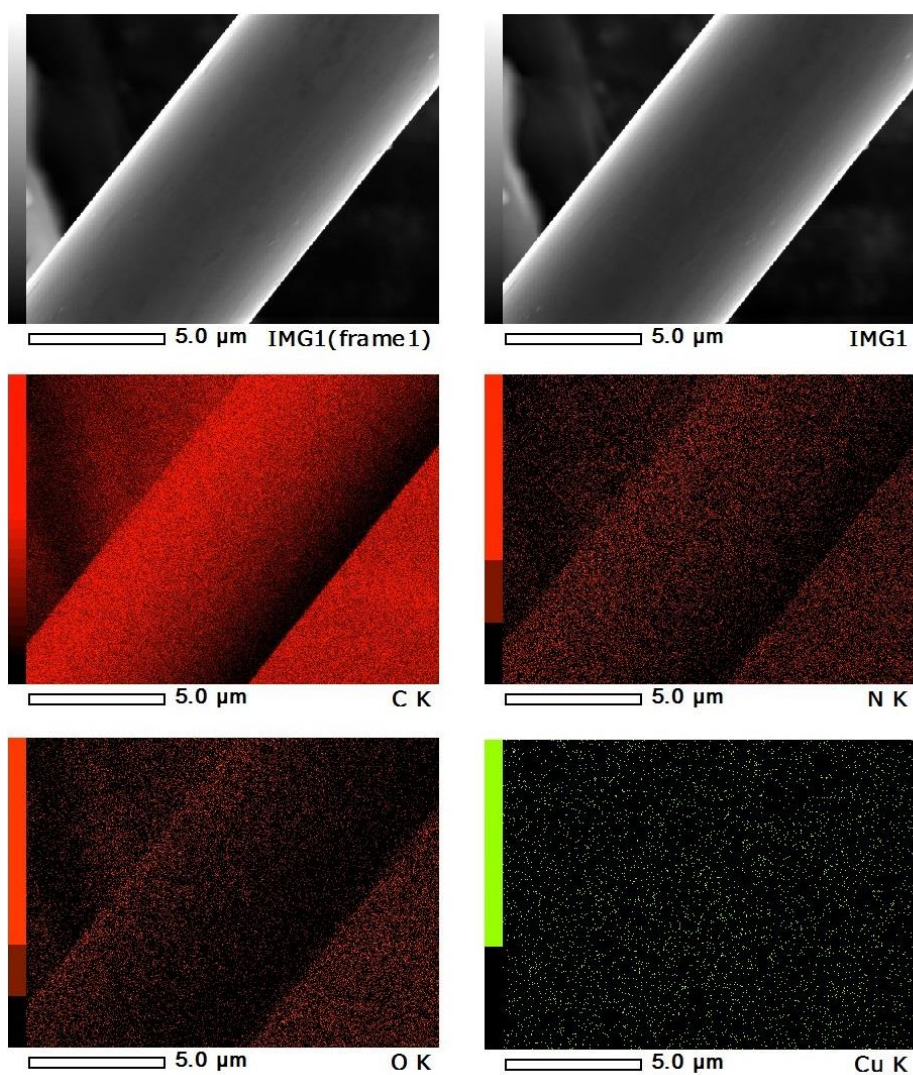

**Figure S14.** Chemical mapping carried out on a functionalized (structure is shown above) carbon fiber sample.

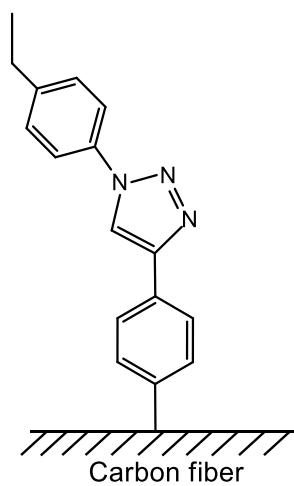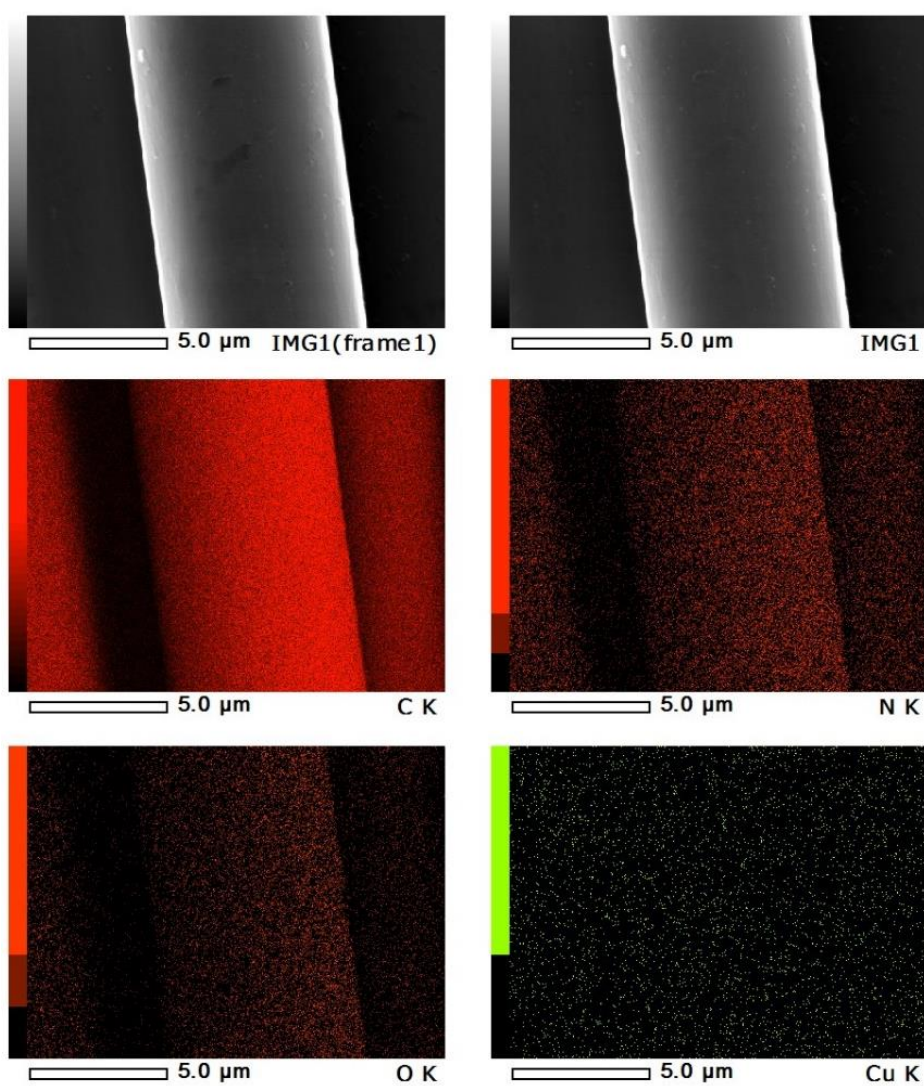

**Figure S15.** Chemical mapping carried out on a functionalized (structure is shown above) carbon fiber sample.

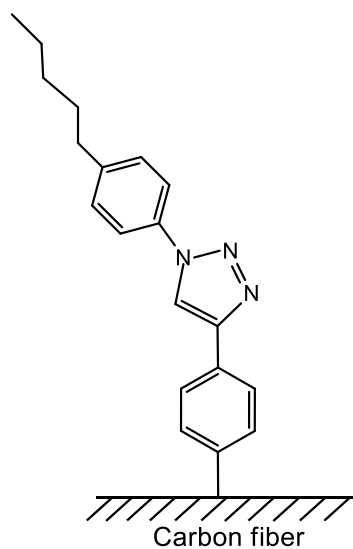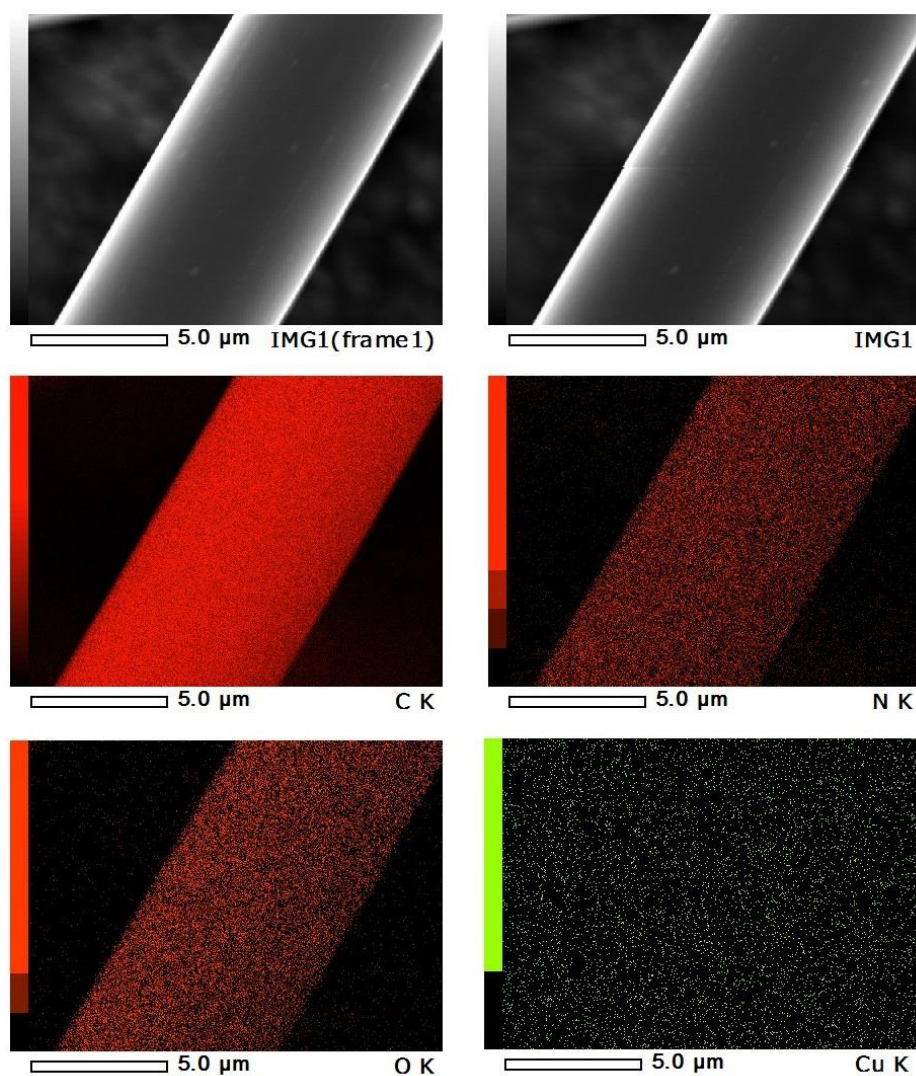

**Figure S16.** Chemical mapping carried out on a functionalized (structure is shown above) carbon fiber sample.

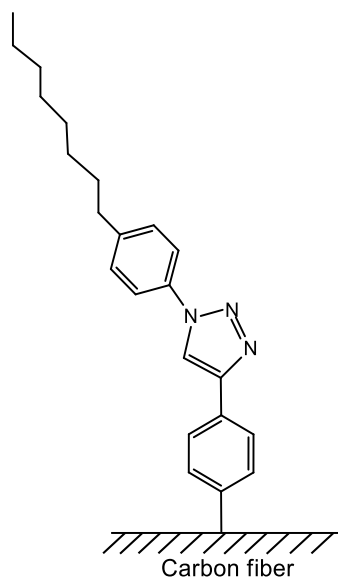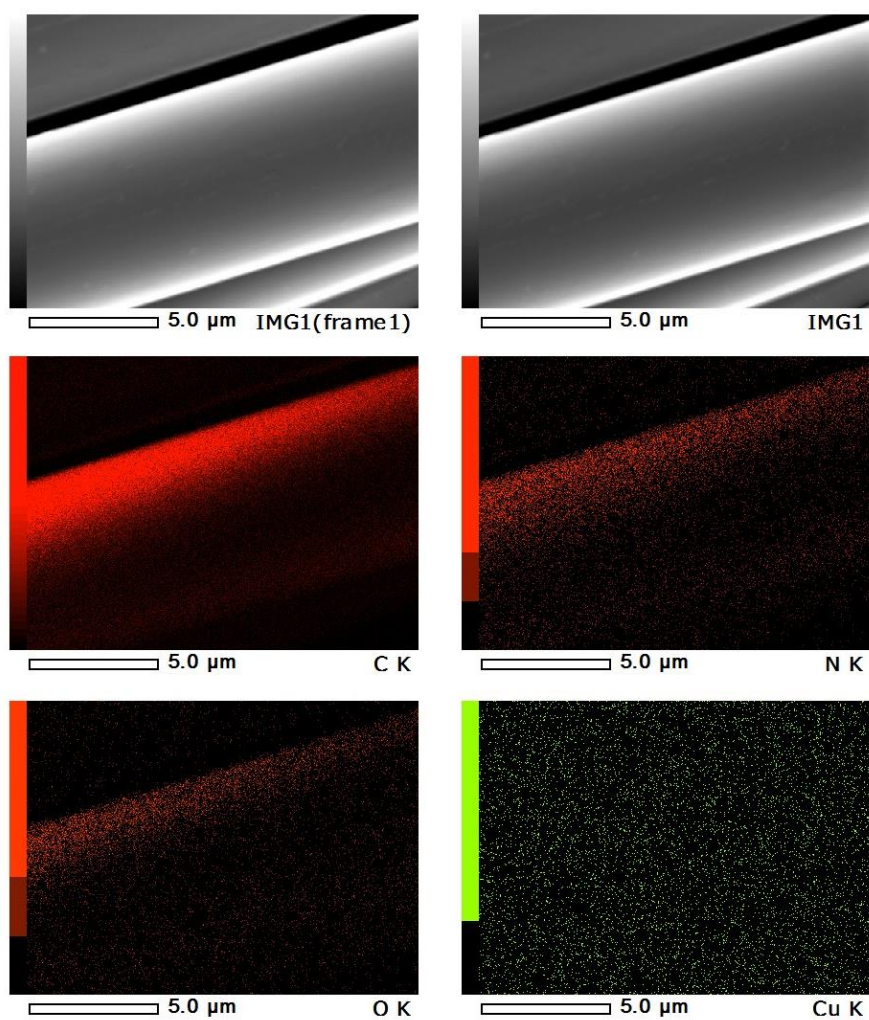

**Figure S17.** Chemical mapping carried out on a functionalized (structure is shown above) carbon fiber sample.

## 5. Cyclic voltammetry experiments

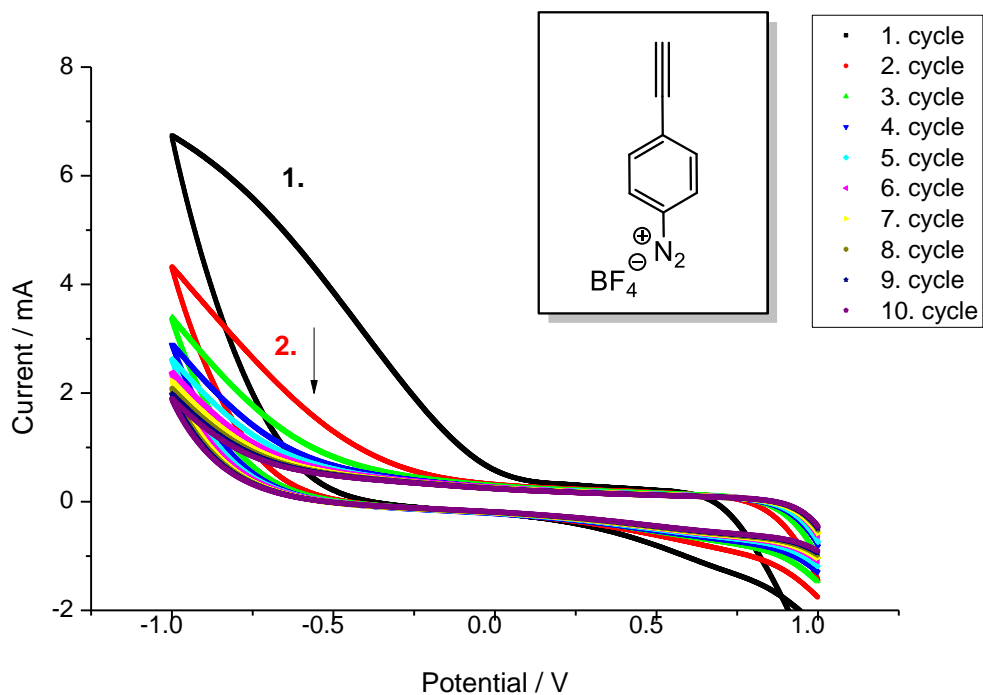

**Figure S18.** Cyclic voltammogram recorded for 4-(ethynyl)benzenediazonium tetrafluoroborate at 10 mM concentration using a scan rate of 0.2 V s<sup>-1</sup>.

## 6. References

- [1] T. Heinze, T. F. Liebert, K. S. Pfeiffer, M. A. Hussain, *Cellulose* **2003**, *10*, 283.
- [2] J. Bahr, J. M. Tour, *Chem. Mater.* **2001**, *13*, 3823.
- [3] L. Servinis, L. C. Henderson, L. M. Andrighetto, M. G. Huson, T. R. Gengenbach, B. L. Fox, *J. Mater. Chem. A* **2015**, *3*, 3360.
- [4] L. Servinis, K. M. Beggs, T. R. Gengenbach, E. H. Doeven, P. S. Francis, B. L. Fox, J. M. Pringle, C. Pozo-Gonzalo, T. R. Walsh, L. C. Henderson, *J. Mater. Chem. A* **2017**, *5*, 11204.
- [5] K. Barral, A. D. Moorhouse, J. E. Moses, *Org. Lett.* **2007**, *9*, 1809.
- [6] D. Kosynkin, T. M. Bockman, J. K. Kochi, *J. Chem. Soc. Perkin Trans. 2* **1997**, 2003.
- [7] S. C. Fox, K. J. Edgar, *Cellulose* **2011**, *18*, 1305.
- [8] K. Furuhata, K. Koganei, H. S. Chang, N. Aoki, M. Sakamoto, *Carbohydr. Res.* **1992**, *230*, 165.
